# Supplementary material
Source: MDPI journal article supplement (https://www.mdpi.com/1424-2818/15/2/158)
Supplement: s1 [file s1]

**Table S1** List of specimens considered in the study, including of voucher numbers, collection information and GenBank numbers. New sequences are shown in bold. Missing data is marked with “-”.

| Families      | Species                       | Specimen<br>n<br>voucher | COI             | 16S             | Sampling locality                                     | Longitude (E) | Latitude (N) | Altitude (m) | Lineage |
|---------------|-------------------------------|--------------------------|-----------------|-----------------|-------------------------------------------------------|---------------|--------------|--------------|---------|
| Lumbriculidae | <i>Lumbriculus variegatus</i> | CW0038                   | <b>OP537036</b> | <b>OP535918</b> | Taihu Lake, Jiangsu, China                            | 120.171       | 31.536       | 37           | II      |
| Lumbriculidae | <i>Lumbriculus variegatus</i> | CW0040                   | <b>OP537037</b> | <b>OP535919</b> | Taihu Lake, Jiangsu, China                            | 120.171       | 31.536       | 37           | II      |
| Lumbriculidae | <i>Lumbriculus variegatus</i> | CW0050                   | <b>OP537038</b> | <b>OP535920</b> | Dongjiang, Guangdong, China                           | 114.402       | 23.102       | 321          | II      |
| Lumbriculidae | <i>Lumbriculus variegatus</i> | CW0741                   | <b>OP537052</b> | <b>OP535937</b> | Qionghai, Sichuan, China                              | 102.267       | 27.862       | -            | II      |
| Lumbriculidae | <i>Lumbriculus variegatus</i> | CW0834                   | <b>OP537053</b> | <b>OP535938</b> | Xinkaihe River, Zhejiang, China                       | 120.470       | 29.954       | -            | II      |
| Lumbriculidae | <i>Lumbriculus variegatus</i> | CW0835                   | <b>OP537054</b> | <b>OP535939</b> | Xinkaihe River, Zhejiang, China                       | 120.470       | 29.954       | -            | II      |
| Lumbriculidae | <i>Lumbriculus variegatus</i> | CW0259                   | MW888788        | <b>OP535921</b> | Wild Goose Island, Naolihe River, Heilongjiang, China | 132.892       | 46.788       | -            | II      |
| Lumbriculidae | <i>Lumbriculus variegatus</i> | CW0262                   | <b>OP537039</b> | <b>OP535922</b> | Wild Goose Island, Naolihe River, Heilongjiang, China | 132.892       | 46.788       | -            | II      |
| Lumbriculidae | <i>Lumbriculus variegatus</i> | CW0263                   | MW888789        | <b>OP535923</b> | Wild Goose Island, Naolihe River, Heilongjiang, China | 132.892       | 46.788       | -            | II      |
| Lumbriculidae | <i>Lumbriculus variegatus</i> | CW0264                   | MW888790        | <b>OP535924</b> | Wild Goose Island, Naolihe River, Heilongjiang, China | 132.892       | 46.788       | -            | II      |
| Lumbriculidae | <i>Lumbriculus</i>            | CW0461                   | <b>OP537040</b> | <b>OP535925</b> | Naolihe River 11, Heilongjiang, China                 | 133.966       | 47.276       | -            | II      |

|               |                               |        |                 |                 |                                       |         |        |      |    |
|---------------|-------------------------------|--------|-----------------|-----------------|---------------------------------------|---------|--------|------|----|
|               | <i>variegatus</i>             |        |                 |                 |                                       |         |        |      |    |
| Lumbriculidae | <i>Lumbriculus variegatus</i> | CW0463 | <b>OP537041</b> | <b>OP535926</b> | Naolihe River 14, Heilongjiang, China | 134.062 | 47.296 | -    | I  |
| Lumbriculidae | <i>Lumbriculus variegatus</i> | CW0719 | <b>OP537045</b> | <b>OP535930</b> | Naolihe River 3, Heilongjiang, China  | 133.221 | 47.233 | -    | II |
| Lumbriculidae | <i>Lumbriculus variegatus</i> | CW0720 | <b>OP537046</b> | <b>OP535931</b> | Naolihe River 5, Heilongjiang, China  | 133.220 | 47.221 | -    | II |
| Lumbriculidae | <i>Lumbriculus variegatus</i> | CW0722 | <b>OP537047</b> | <b>OP535932</b> | Naolihe River 6, Heilongjiang, China  | 133.456 | 47.248 | -    | I  |
| Lumbriculidae | <i>Lumbriculus variegatus</i> | CW0724 | <b>OP537048</b> | <b>OP535933</b> | Naolihe River 12, Heilongjiang, China | 133.961 | 47.275 | -    | I  |
| Lumbriculidae | <i>Lumbriculus variegatus</i> | CW0727 | <b>OP537049</b> | <b>OP535934</b> | Naolihe River 21, Heilongjiang, China | 133.023 | 46.521 | -    | II |
| Lumbriculidae | <i>Lumbriculus variegatus</i> | CW0732 | <b>OP537050</b> | <b>OP535935</b> | Naolihe River 24, Heilongjiang, China | 132.892 | 46.788 | -    | II |
| Lumbriculidae | <i>Lumbriculus variegatus</i> | CW0735 | <b>OP537051</b> | <b>OP535936</b> | Naolihe River 25, Heilongjiang, China | 132.949 | 46.784 | -    | II |
| Lumbriculidae | <i>Lumbriculus variegatus</i> | CW0632 | <b>OP537042</b> | <b>OP535927</b> | Batang Grassland, Qinghai, China      | 97.051  | 32.852 | 3841 | I  |
| Lumbriculidae | <i>Lumbriculus variegatus</i> | CW0633 | <b>OP537043</b> | <b>OP535928</b> | Longbao Beach, Qinghai, China         | 96.510  | 33.212 | 4204 | I  |
| Lumbriculidae | <i>Lumbriculus variegatus</i> | CW0634 | <b>OP537044</b> | <b>OP535929</b> | Longbao Beach, Qinghai, China         | 96.510  | 33.212 | 4204 | I  |
| Lumbriculidae | <i>Lumbriculus variegatus</i> | CW0786 | <b>OP536146</b> | <b>OP535889</b> | Niyanghe River, Xizang, China         | 92.499  | 29.891 | 4260 | I  |
| Lumbriculidae | <i>Lumbriculus</i>            | CW0787 | <b>OP536130</b> | <b>OP535890</b> | Niyanghe River, Xizang, China         | 92.499  | 29.891 | 4260 | I  |

|               |                               |        |                 |                 |                               |        |        |      |   |
|---------------|-------------------------------|--------|-----------------|-----------------|-------------------------------|--------|--------|------|---|
|               | <i>variegatus</i>             |        |                 |                 |                               |        |        |      |   |
| Lumbriculidae | <i>Lumbriculus variegatus</i> | CW0788 | <b>OP536131</b> | <b>OP535891</b> | Niyanghe River, Xizang, China | 92.499 | 29.891 | 4260 | I |
| Lumbriculidae | <i>Lumbriculus variegatus</i> | CW0789 | <b>OP536132</b> | <b>OP535892</b> | Niyanghe River, Xizang, China | 92.499 | 29.891 | 4260 | I |
| Lumbriculidae | <i>Lumbriculus variegatus</i> | CW0790 | <b>OP536133</b> | <b>OP535893</b> | Niyanghe River, Xizang, China | 92.499 | 29.891 | 4260 | I |
| Lumbriculidae | <i>Lumbriculus variegatus</i> | CW0792 | <b>OP536134</b> | <b>OP535894</b> | Lalu Wetland, Xizang, China   | 91.104 | 29.665 | 3647 | I |
| Lumbriculidae | <i>Lumbriculus variegatus</i> | CW0793 | <b>OP537029</b> | <b>OP535895</b> | Lalu Wetland, Xizang, China   | 91.104 | 29.665 | 3647 | I |
| Lumbriculidae | <i>Lumbriculus variegatus</i> | CW0797 | <b>OP536135</b> | <b>OP535896</b> | Cuomujiri, Xizang, China      | 94.408 | 29.762 | 4122 | I |
| Lumbriculidae | <i>Lumbriculus variegatus</i> | CW0798 | <b>OP537030</b> | <b>OP535897</b> | Cuomujiri, Xizang, China      | 94.408 | 29.762 | 4122 | I |
| Lumbriculidae | <i>Lumbriculus variegatus</i> | CW0803 | <b>OP536147</b> | <b>OP535898</b> | Milin, Xizang, China          | 94.439 | 29.442 | 2927 | I |
| Lumbriculidae | <i>Lumbriculus variegatus</i> | CW0804 | <b>OP536148</b> | <b>OP535899</b> | Milin, Xizang, China          | 94.439 | 29.442 | 2927 | I |
| Lumbriculidae | <i>Lumbriculus variegatus</i> | CW0805 | <b>OP536149</b> | <b>OP535900</b> | Milin, Xizang, China          | 94.439 | 29.442 | 2927 | I |
| Lumbriculidae | <i>Lumbriculus variegatus</i> | CW0807 | <b>OP536136</b> | <b>OP535901</b> | Lulang, Xizang, China         | 94.732 | 29.607 | 3327 | I |
| Lumbriculidae | <i>Lumbriculus variegatus</i> | CW0808 | <b>OP537031</b> | <b>OP535902</b> | Lulang, Xizang, China         | 94.732 | 29.607 | 3327 | I |
| Lumbriculidae | <i>Lumbriculus</i>            | CW0810 | <b>OP537032</b> | <b>OP535903</b> | Lulang, Xizang, China         | 94.732 | 29.607 | 3327 | I |

|               |                               |        |                 |                 |                                       |        |        |      |   |
|---------------|-------------------------------|--------|-----------------|-----------------|---------------------------------------|--------|--------|------|---|
|               | <i>variegatus</i>             |        |                 |                 |                                       |        |        |      |   |
| Lumbriculidae | <i>Lumbriculus variegatus</i> | CW0811 | <b>OP536137</b> | <b>OP535904</b> | Zhegucuo, Xizang, China               | 91.641 | 28.710 | 4620 | I |
| Lumbriculidae | <i>Lumbriculus variegatus</i> | CW0812 | <b>OP536150</b> | <b>OP535905</b> | Zhegucuo, Xizang, China               | 91.641 | 28.710 | 4620 | I |
| Lumbriculidae | <i>Lumbriculus variegatus</i> | CW0813 | <b>OP536138</b> | <b>OP535906</b> | Zhegucuo, Xizang, China               | 91.641 | 28.710 | 4620 | I |
| Lumbriculidae | <i>Lumbriculus variegatus</i> | CW0814 | <b>OP536151</b> | <b>OP535907</b> | Zhegucuo, Xizang, China               | 91.641 | 28.710 | 4620 | I |
| Lumbriculidae | <i>Lumbriculus variegatus</i> | CW0815 | <b>OP536152</b> | <b>OP535908</b> | Zhegucuo, Xizang, China               | 91.641 | 28.710 | 4620 | I |
| Lumbriculidae | <i>Lumbriculus variegatus</i> | CW0816 | <b>OP537033</b> | <b>OP535909</b> | Zigetangcuo Hot Spring, Xizang, China | 91.816 | 32.037 | 4568 | I |
| Lumbriculidae | <i>Lumbriculus variegatus</i> | CW0817 | <b>OP536153</b> | <b>OP535910</b> | Zigetangcuo Hot Spring, Xizang, China | 91.816 | 32.037 | 4568 | I |
| Lumbriculidae | <i>Lumbriculus variegatus</i> | CW0818 | <b>OP536139</b> | <b>OP535911</b> | Zigetangcuo Hot Spring, Xizang, China | 91.816 | 32.037 | 4568 | I |
| Lumbriculidae | <i>Lumbriculus variegatus</i> | CW0819 | <b>OP537034</b> | <b>OP535912</b> | Zigetangcuo Hot Spring, Xizang, China | 91.816 | 32.037 | 4568 | I |
| Lumbriculidae | <i>Lumbriculus variegatus</i> | CW0820 | <b>OP536140</b> | <b>OP535913</b> | Zigetangcuo Hot Spring, Xizang, China | 91.816 | 32.037 | 4568 | I |
| Lumbriculidae | <i>Lumbriculus variegatus</i> | CW0822 | <b>OP536141</b> | <b>OP535914</b> | Boquzangbu Wetland, Xizang, China     | 89.451 | 31.435 | 4869 | I |
| Lumbriculidae | <i>Lumbriculus variegatus</i> | CW0823 | <b>OP536154</b> | <b>OP535915</b> | Boquzangbu Wetland, Xizang, China     | 89.451 | 31.435 | 4869 | I |
| Lumbriculidae | <i>Lumbriculus</i>            | CW0824 | <b>OP537035</b> | <b>OP535916</b> | Boquzangbu Wetland, Xizang, China     | 89.451 | 31.435 | 4869 | I |

|               |                                                              |        |                 |                 |                                       |        |        |      |    |
|---------------|--------------------------------------------------------------|--------|-----------------|-----------------|---------------------------------------|--------|--------|------|----|
| Lumbriculidae | <i>variegatus</i><br><i>Lumbriculus</i><br><i>variegatus</i> | CW0825 | <b>OP536584</b> | <b>OP535917</b> | Boquzangbu Wetland, Xizang, China     | 89.451 | 31.435 | 4869 | I  |
| Lumbriculidae | <i>Lumbriculus</i><br><i>variegatus</i>                      | CE1104 | FJ639289        | FJ639260        | Lärjeån, Göteborg, Sweden             | 12.002 | 57.765 | -    | I  |
| Lumbriculidae | <i>Lumbriculus</i><br><i>variegatus</i>                      | CE1103 | FJ639288        | FJ639259        | Lärjeån, Göteborg, Sweden             | 12.002 | 57.765 | -    | I  |
| Lumbriculidae | <i>Lumbriculus</i><br><i>variegatus</i>                      | CE1102 | FJ639280        | FJ639255        | Strömsbergsån, Jönköping, Sweden      | 14.169 | 57.782 | -    | II |
| Lumbriculidae | <i>Lumbriculus</i><br><i>variegatus</i>                      | CE1109 | FJ639301        | FJ639266        | Bålerödsbäcken, Strömstad, Sweden     | 11.193 | 58.944 | -    | I  |
| Lumbriculidae | <i>Lumbriculus</i><br><i>variegatus</i>                      | CE27   | FJ639299        | FJ639263        | Viktoriadammen, Stockholm, Sweden     | 18.052 | 59.330 | -    | I  |
| Lumbriculidae | <i>Lumbriculus</i><br><i>variegatus</i>                      | CE1106 | FJ639291        | FJ639262        | Kvibergsbäcken, Göteborg, Sweden      | -      | -      | -    | I  |
| Lumbriculidae | <i>Lumbriculus</i><br><i>variegatus</i>                      | CE1105 | FJ639290        | FJ639261        | Lärjeån, Göteborg, Sweden             | 12.002 | 57.765 | -    | I  |
| Lumbriculidae | <i>Lumbriculus</i><br><i>variegatus</i>                      | CE1100 | FJ639287        | FJ639258        | Lärjeån, Göteborg, Sweden             | 12.002 | 57.765 | -    | I  |
| Lumbriculidae | <i>Lumbriculus</i><br><i>variegatus</i>                      | CE1108 | FJ639286        | FJ639257        | Klämmestorpsbäcken, Jönköping, Sweden | 14.196 | 57.778 | -    | I  |
| Lumbriculidae | <i>Lumbriculus</i><br><i>variegatus</i>                      | CE1101 | FJ639285        | FJ639256        | Klämmestorpsbäcken, Jönköping, Sweden | 14.196 | 57.778 | -    | I  |
| Lumbriculidae | <i>Lumbriculus</i><br><i>variegatus</i>                      | CE1072 | FJ639307        | FJ639271        | Inglenook Fen, California, America    | -      | -      | -    | I  |
| Lumbriculidae | <i>Lumbriculus</i>                                           | CE869  | FJ639306        | FJ639270        | Aquatic Foods, California, America    | -      | -      | -    | I  |

|                  |                                 |                   |              |              |             |   |   |   |   |
|------------------|---------------------------------|-------------------|--------------|--------------|-------------|---|---|---|---|
| <b>Outgroups</b> |                                 | <i>variegatus</i> |              |              |             |   |   |   |   |
| Naididae         | <i>Tubifex tubifex</i>          | -                 | MW69057<br>9 | MW69057<br>9 | South Korea | - | - | - | - |
| Naididae         | <i>Limnodrilus hoffmeisteri</i> | -                 | MW73214<br>4 | MW73214<br>4 | South Korea | - | - | - | - |
| Moniligastridae  | <i>Drawida japonica</i>         | -                 | KM199288     | KM199288     | China       | - | - | - | - |
| Megascolecidae   | <i>Perionyx excavatus</i>       | -                 | EF494507     | EF494507     | South Korea | - | - | - | - |
| Megascolecidae   | <i>Amyntas triastriatus</i>     | -                 | KT429016     | KT429016     | China       | - | - | - | - |
| Lumbricidae      | <i>Aporrectodea rosea</i>       | -                 | MK573632     | MK573632     | Russia      | - | - | - | - |
| Lumbricidae      | <i>Lumbricus rubellus</i>       | -                 | MN102127     | MN102127     | China       | - | - | - | - |
